# Supplementary material for: Solubility switch of gold nanoparticles through hydrogen bond association
Source: Royal Society of Chemistry journal article supplement (doi:10.1039/b810932j), 2008-01-01

## Supplementary Information

### Solubility switch of gold nanoparticles through hydrogen bond association

Daniela VULUGA, Julien LEGROS\*, Benoît CROUSSE\* and Danièle BONNET-DELPON

#### General methods:

$^1\text{H}$ ,  $^{19}\text{F}$  and  $^{13}\text{C}$  NMR spectra were obtained on a Brücker 200, 300 or 400 spectrometer. Chemical shifts  $\delta$  are given in ppm relative to TMS, as internal standard for  $^1\text{H}$  and  $^{13}\text{C}$  NMR, and relative to  $\text{CFCl}_3$   $^{19}\text{F}$  NMR. Coupling constant  $J$  are measured in Hz.

Elemental analyses of gold nanoparticles were performed at the Service Central d'Analyses of CNRS in Vernaison, France.

TEM micrographs of nanoparticles were taken on a TEM Philips EM208 (1996) equipped with a CCD video camera AMT at the Centre Commun de Microscopie Electronique (CCME) at the Université-Paris Sud, Orsay, France. The TEM micrographs were analysed with ImageJ software.

#### Materials:

All chemicals were used as provided without further purification. 1,1,1-trifluoro-2-(trifluoromethyl)pent-4-en-2-ol (AllylHFIP **1**) was provided by Central Glass Co. Ltd. Thioacetic acid and  $\text{HAuCl}_4 \cdot 3\text{H}_2\text{O}$  were purchased from Acros, and each bottle was used entirely for a single experiment.

#### Monitoring of the reactions:

The conversion of the fluorinated substrates into products was measured by integration of the trifluoromethyl signals by  $^{19}\text{F}$  NMR, directly from the reaction mixture.

### Synthesis of the thioester **2**:

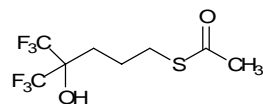

A round bottom flask was charged with thioacetic acid (5 g, 65.8 mmol) and **1** (2 g, 98.7 mmol) in dichloroethane (40 mL) and heated to reflux under argon atmosphere. After 15 minutes of reflux, AIBN (540 mg, 3.3 mmol) was added. The reaction was complete after 6 hours, and then the solvent was distilled from the reaction mixture to provide the product **2** as a stinky colorless liquid in a 98% yield (18.4 g).

$^1\text{H}$  NMR ( $\text{CDCl}_3$ , 200 MHz),  $\delta$ : 1.85 (m, 2H); 1.95 (m, 2H); 2.31 (s, 3H); 2.87 (t,  $J=7.2$ , 2H); 4.63 (s, 1H).

$^{13}\text{C}$  NMR ( $\text{CDCl}_3$ , 75 MHz),  $\delta$ : 22.2; 28.9; 29.1; 30.3; 76.1 (hept,  $J=29.1$ ); 123.2 (q,  $J=290$ ); 198.1.

$^{19}\text{F}$  NMR ( $\text{CDCl}_3$ , 188 MHz),  $\delta$ :  $-77.22$  (s).

APCI  $m/z$  (rel. int.): 285  $[\text{M}+\text{H}]^+$  (100).

### Synthesis of the thiol **3**:

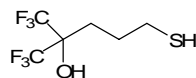

The thioester **2** (2.84 g, 10 mmol) was dissolved in dry THF (30 mL) under argon atmosphere and cooled to 0 °C. Then  $\text{LiAlH}_4$  (1.52 g, 40 mmol) was added portionwise at 0 °C over 20 min. and then warmed to room temperature. After completion of the reaction (1 h), the solution was cooled to  $-78$  °C and then hydrolysed with water (30 mL). The mixture was extracted with AcOEt (3 x 50 mL), the combined organic phases were dried ( $\text{MgSO}_4$ ), filtered and the solvents were finally evaporated to afford **3** as a stinky colorless liquid (2.4 g, 99% yield).

$^1\text{H}$  NMR ( $\text{CDCl}_3$ , 300 MHz),  $\delta$ : 1.39 (t,  $J=8.1$ , SH); 1.86 (m, 2H); 2.03 (m, 2H); 2.55 (dt,  $J=8.1$ , 7.0, 2H); 4.38 (s, 1H).

$^{13}\text{C}$  NMR ( $\text{CDCl}_3$ , 75 MHz),  $\delta$ : 24.5; 25.3; 26.1; 76.0 (hept,  $J=29.1$ ); 123.2 (q,  $J=291$ ).

$^{19}\text{F}$  NMR ( $\text{CDCl}_3$ , 188 MHz),  $\delta$ :  $-77.15$  (s).

APCI  $m/z$  (rel. int.): 483  $[2\text{M}-2+\text{H}]^+$  (100).

### Synthesis of HFIP-gold nanoparticles (HFIP-AuNPs):

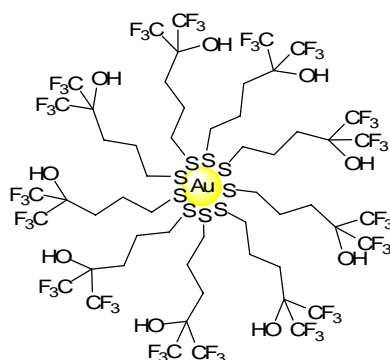

The thiol **3** (650 mg, 5 mmol) was dissolved in methanol (350 mL) with glacial acetic acid (7.5 mL) and  $\text{HAuCl}_4 \cdot 3\text{H}_2\text{O}$  (788 mg, 2 mmol). To this mixture was added a freshly prepared 0.4 M aqueous solution of  $\text{NaBH}_4$  (75 mL; 30 mmol) under stirring. After one hour, the solvent was removed under vacuum and the residue was washed with water and  $\text{CH}_2\text{Cl}_2$  to afford a sticky brown solid (450mg).

$^1\text{H}$  NMR ( $\text{CD}_3\text{OD}$ , 300 MHz),  $\delta$ : 2.00 (m, 4H); 2.76 (t,  $J=6.7$ , 2H).

$^{19}\text{F}$  NMR ( $\text{CD}_3\text{OD}$ , 376 MHz),  $\delta$ :  $-79.26$  (s).

Elemental analysis (%): Au = 72.96; S = 3.79.

Nanoparticle size obtained by TEM:  $2.8 \pm 1.4$  ( $\approx$  410 Au atoms and 130 ligands *per* nanoparticle).

### General procedure for complexes formation of HFIP-AuNPs with amines:

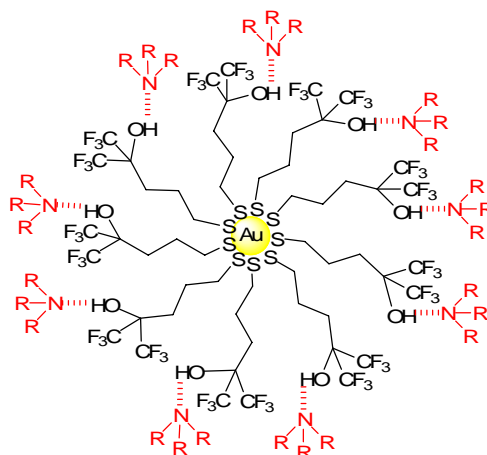

HFIP-AuNPs (20 mg) were dissolved in ethyl acetate and a solution of amine in ethyl acetate was added dropwise. The complex is formed as a dark-brown powder while the amine is added. AcOEt was evaporated and the excess of amine was eliminated by washing with water and a suitable organic solvent.

**HFIP-AuNPs/piperazine complex:**

$^1\text{H}$  NMR ( $\text{CD}_3\text{OD}$ , 300 MHz),  $\delta$ : 2.04 (m, 4H); 2.72 (s, 0.4 $\times$ 8H); 3.05 (m, 2H).

$^{19}\text{F}$  NMR ( $\text{CD}_3\text{OD}$ , 376 MHz),  $\delta$ : -77.75 (s).

Elemental analysis (%): Au = 71.51; S = 4.07; N = 1.43.

Nanoparticle size obtained by TEM:  $2.8 \pm 1.9$  ( $\approx 0.4$  piperazines *per* alcohol).

**HFIP-AuNPs/DABCO complex:**

$^1\text{H}$  NMR ( $\text{CD}_3\text{OD}$ , 300 MHz),  $\delta$ : 2.12 (m, 4H); 2.88 (s, 0.3 $\times$ 12H); 3.01 (m, 2H).

$^{19}\text{F}$  NMR ( $\text{CD}_3\text{OD}$ , 376 MHz),  $\delta$ : -77.50 (s).

Elemental analysis (%): Au = 72.18; S = 3.50; N = 1.01.

Nanoparticle size obtained by TEM:  $2.8 \pm 1.3$  ( $\approx 0.35$  DABCO *per* alcohol).

**HFIP-AuNPs/tributylamine complex:**

$^1\text{H}$  NMR ( $\text{CD}_3\text{OD}$ , 300 MHz),  $\delta$ : 1.07 (t,  $J=7.3$ , 0.3 $\times$ 9H); 1.46 (pent,  $J=7.4$ , 0.3 $\times$ 6H); 1.73 (m, 0.3 $\times$ 6H); 2.03 (m, 4H and 0.3 $\times$ 6H); 2.76 (t,  $J=6.7$ , 2H).

$^{19}\text{F}$  NMR ( $\text{CD}_3\text{OD}$ , 376 MHz),  $\delta$ : -79.13 (s).

Elemental analysis (%): Au = 49.13; S = 4.32; N = 0.56.

Nanoparticle size obtained by TEM:  $2.9 \pm 1.6$  ( $\approx 0.3$  amines *per* alcohol).

**HFIP-AuNPs/tridodecylamine complex:**

$^1\text{H}$  NMR ( $\text{CD}_3\text{OD}$ , 300 MHz),  $\delta$ : 0.93 (t,  $J=6.7$ , 0.3 $\times$ 9H); 1.33 (m, 0.3 $\times$ 60H); 2.08 (m, 4H and 0.3 $\times$ 6H); 2.88 (m, 2H).

$^{19}\text{F}$  NMR ( $\text{CD}_3\text{OD}$ , 376 MHz),  $\delta$ : -79.23 (s).

Elemental analysis (%): Au = 47.19; S = 4.66; N = 0.52.

Nanoparticle size obtained by TEM:  $4 \pm 2.3$  ( $\approx 0.3$  amines *per* alcohol).

## TEM micrographs and the corresponding size histograms of HFIP-AuNPs and their amine complexes:

AuNPs:  $2.8 \pm 1.4$  nm

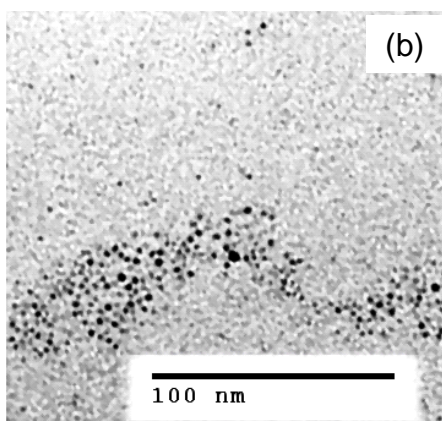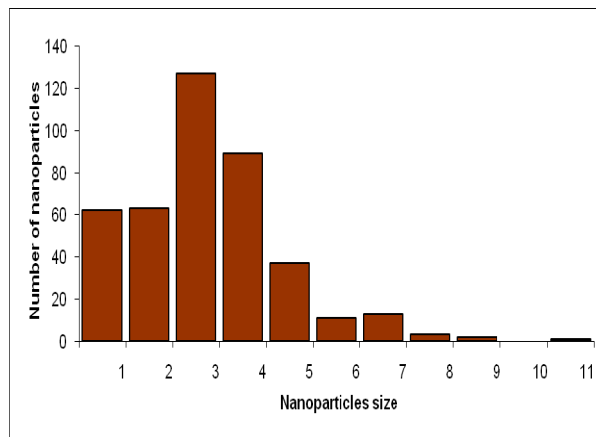

AuNPs-piperazine:  $2.8 \pm 1.9$  nm

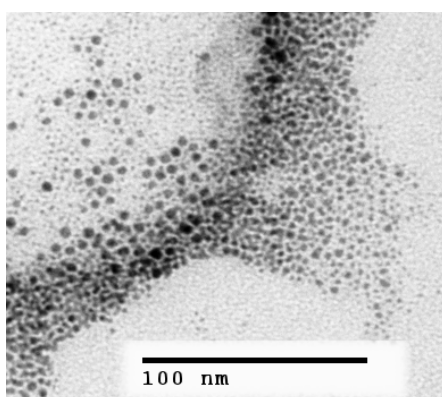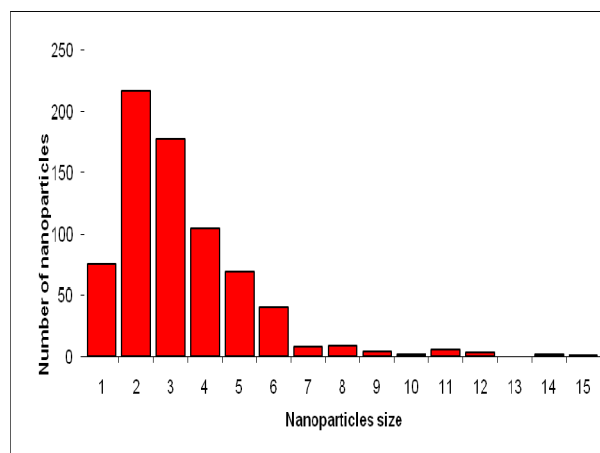

AuNPs-DABCO:  $2.8 \pm 1.3$  nm

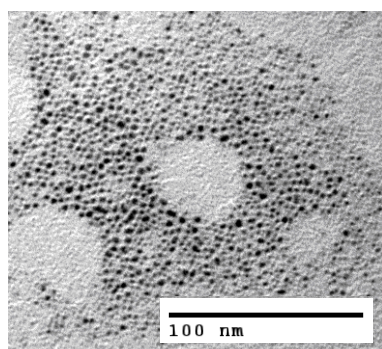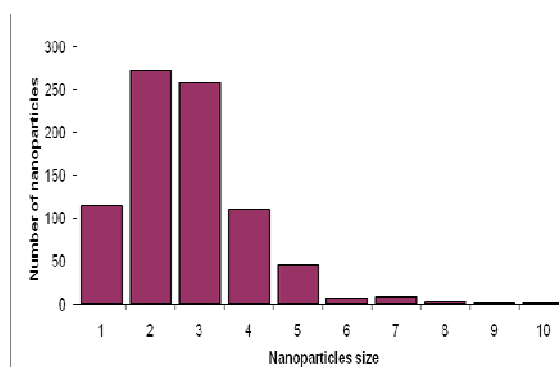

AuNPs-TBA:  $2.9 \pm 1.6$  nm

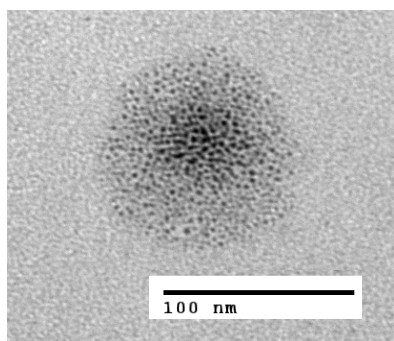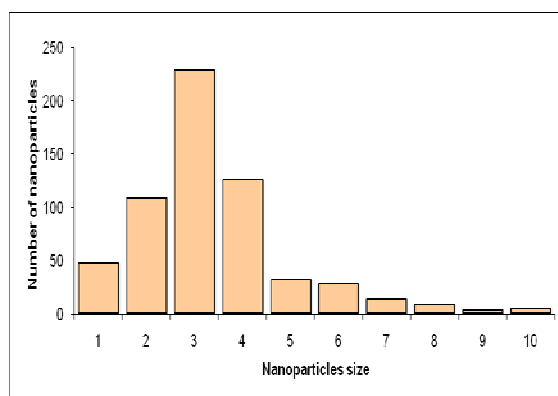

AuNPs-TDA:  $4.0 \pm 2.3$  nm

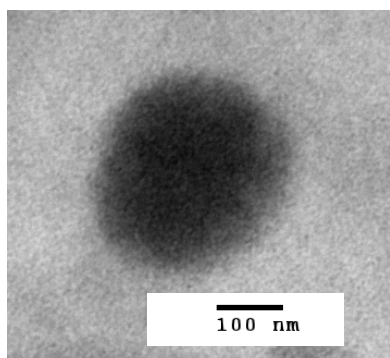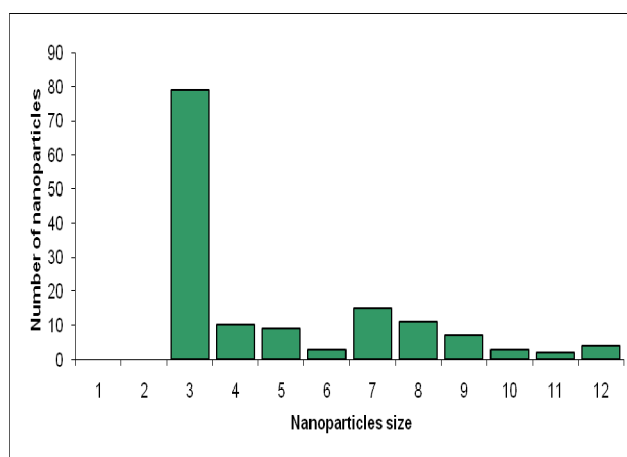

Supplement: b810932j.pdf [file b810932j.pdf]
